# Supplementary material for: Reporting of Race and Ethnicity in Studies of Interventions Published in the Canadian Medical Association Journal: A Methodological Review
Source: Research Square preprint supplement (doi:10.21203/rs.3.rs-6406911/v1), 2025-05-20
Supplement: Supplementary file 1 [file 92bc436b5daf0f010cb29437.docx]

**Table S1: CMAJ Guidance For Race and Ethnicity Reporting**

| CMAJ Guidance |
| --- |
| 1. CMAJ encourages the collection, analysis and reporting of data on the race and ethnicity of research participants, in order to provide evidence regarding health effects, disparities and inequities experienced by different racial and ethnic groups. |
| 2. CMAJ strongly encourages representation, as study partners, co-investigators and authors, of people from racial and ethnic groups affected by the health context being studied, especially for studies that explore racism, race and ethnicity as determinants of health |
| 3. Authors should explain the purpose and relevance of collecting, analyzing and reporting data on race or ethnicity in their study and what race and ethnicity represent in the context of the research question. |
| 4. Authors should report race and ethnicity together with other demographics of the study population. |
| 1. Race and ethnicity should be listed together with other variables collected and analyzed in the Methods section. 2. Race and ethnicity should be reported together with other demographic variables in a table and summarized at the beginning of the Results section. |
| 5. As race and ethnicity are inherently social constructs, studies that analyze race and ethnicity should endeavour to explore their effects in the context of other sociodemographic variables and structures. |
| 6. In the Methods section, authors should describe how race and ethnicity of study participants was determined and by whom (e.g., “Study participants self-identified their race from 12 categories provided in the 2019 version of the Canadian Community Health Survey ...”). |
| 1. Authors should explain whether race and ethnicity were self-identified by study participants or identified by others, providing justification if self-identification was not used. 2. Authors should state whether options that participants could select to indicate their race or ethnicity were open-ended or based on fixed categories, listing the categories available, if applicable, and whether participants were allowed to identify as belonging to more than 1 racial or ethnic group. 3. If race and ethnicity categories were determined or constrained by external factors (e.g., government legislation), or were originally collected for a purpose different from the purpose of the study being reported, authors should explain this. |
| 7. As race and ethnicity are inherently social constructs, they should not be presented as an independent surrogate for biological or genetic variation or genetic ancestry. |
| 1. Studies that seek to test genetic hypotheses require collection, analysis and reporting of genetic data. 2. Although genetic or biological predispositions to certain diseases may track with specific racial and ethnic groups, researchers should not exclude otherwise eligible participants from other groups capable of developing the disease, as doing so may worsen under-recognition of the disease in such groups. 3. Race-based algorithms (e.g., “corrected” creatinine clearance for Black people) should not be used, as such “race corrections” typically oversimplify, creating the potential for inequity and harm. 4. Exceptionally, in contexts where genetic characteristics travel very closely with race and ethnicity (e.g., the association between skin pigmentation and vitamin D levels), the rationale and validity of treating race and ethnicity as biological surrogates must be clearly explained and justified. |
| 8. Authors should comment on how their social position and identity, including race and ethnicity and their intersection with other factors, might have influenced data collection, analysis and interpretation, and how the researchers addressed power relations throughout the research process. |
| 9. In the Interpretation section, for studies that highlight associations of race and ethnicity with health outcomes, authors should discuss how their findings illustrate the intersection of race and ethnicity with other sociodemographic factors in the health context being studied, the role of structural racism in this context and how this might be addressed. |
| 10. Authors must use appropriate, precise and respectful language to describe study participants and avoid the use of terminology that might stigmatize participants. |
| 1. Terms that imply a hierarchy among races (e.g., “non-White”) should be avoided and preferred terms (e.g., “under-served” or “underrepresented” populations, “historically marginalized groups”) used instead, as contextually appropriate. 2. Listing of racial and ethnic groups in tables should be ordered based on an empirical rationale rather than one that implies a hierarchy (e.g., “White” should not automatically be listed first). 3. Naming racial and ethnic categories as specifically as is appropriate to the study context is preferred over use of collective categories (e.g., “Indian” would be suitable in the context of some research questions, but in other contexts, “Punjabi” and “Malayali” could be more relevant; “Asian” is usually too generic to be sufficiently informative). 4. It is acceptable to pool racial and ethnic groups for analysis when necessary and appropriate, but authors should explain and justify the manner in which this is done and ensure that the individual racial and ethnic groups within each category are identified. 5. Racial and ethnic terms should be used in adjective form rather than in noun form (e.g., “Hispanic people,” not “Hispanics”). 6. Names of racial, ethnic or tribal groups should be capitalized. 7. Authors should use preferred contemporary names for racial and ethnic groups (e.g., White, not Caucasian). 8. As preferred names for racial and ethnic groups may vary and may change over time, authors should be guided as much as possible by the preferences of study participants as to their expressed identity. |

**Table S2: Race and Ethnicity Categories Used by Studies**

| **Word** | **Frequency** |
| --- | --- |
| **Ethnicity (12 Studies)** | |
| White | 9 |
| Other | 6* |
| Aboriginal | 3 |
| Asian | 2 |
| Black | 2 |
| South Asian | 2 |
| No information | 2 |
| White only/non-White | 2 |
| White/Visible Minority | 1 |
| Arab | 1 |
| Latin American | 1 |
| West Asian | 1 |
| European | 1 |
| Indigenous or First Nation | 1 |
| African | 1 |
| Bangladeshi | 1 |
| Hispanic | 1 |
| Maori | 1 |
| Middle Eastern | 1 |
| Mixed Race | 1 |
| **None Specified (5 Studies)** | |
| White Only | 4 |
| First Nations | 1 |
| **Race (1 Study)** | |
| Black | 1 |
| White | 1 |
| Hispanic | 1 |

*1 of these studies included a breakdown of the “other” category

**Table S3: Discussions of Study Implications Related to Race or Ethnicity**

| **Author, Year** | **Quotes** | **Discussion Type** |
| --- | --- | --- |
| Ali, 2022 | “We were able to include data from several ethnicities, an important component of ensuring generalizability of our results in the Canadian health system, emphasizing the value of recruiting from a wide range of health care facilities.” | Strength regarding generalizability |
| Kerry, 2013 | “Our trial was robust… Furthermore, the age, sex, ethnicity, and prevalence of atrial fibrillation, diabetes and past stroke in our study population were similar to those of 3356 consecutive patients recruited to our local stroke register…which suggests that our findings are generalizable to patients with a history of stroke…. A quarter of the participants were from ethnic minorities... These patients are often excluded from trials but may wish to self-monitor; therefore, their inclusion in our trial added to the generalizability of the findings.” | Strength regarding generalizability |
| Preyde, 2003 | “Individual peer support was found to be effective for mothers who reported a relatively low income and diverse ethnic background; however, it is not known whether these findings can be applied to other populations with different demographic characteristics.” | Limitation to generalizability |
| Reid, 2014 | “Our study had some limitations.… Our participants were primarily well-educated white people who lived in urban areas.” | Limitation to generalizability |
